# Supplementary material for: Fatty Acid Composition of Developing Sea Buckthorn (Hippophae rhamnoides L.) Berry and the Transcriptome of the Mature Seed
Source: PLOS journal article supplement (doi:10.1371/journal.pone.0034099), 2012-04-27

# Metabolic process (13,010)

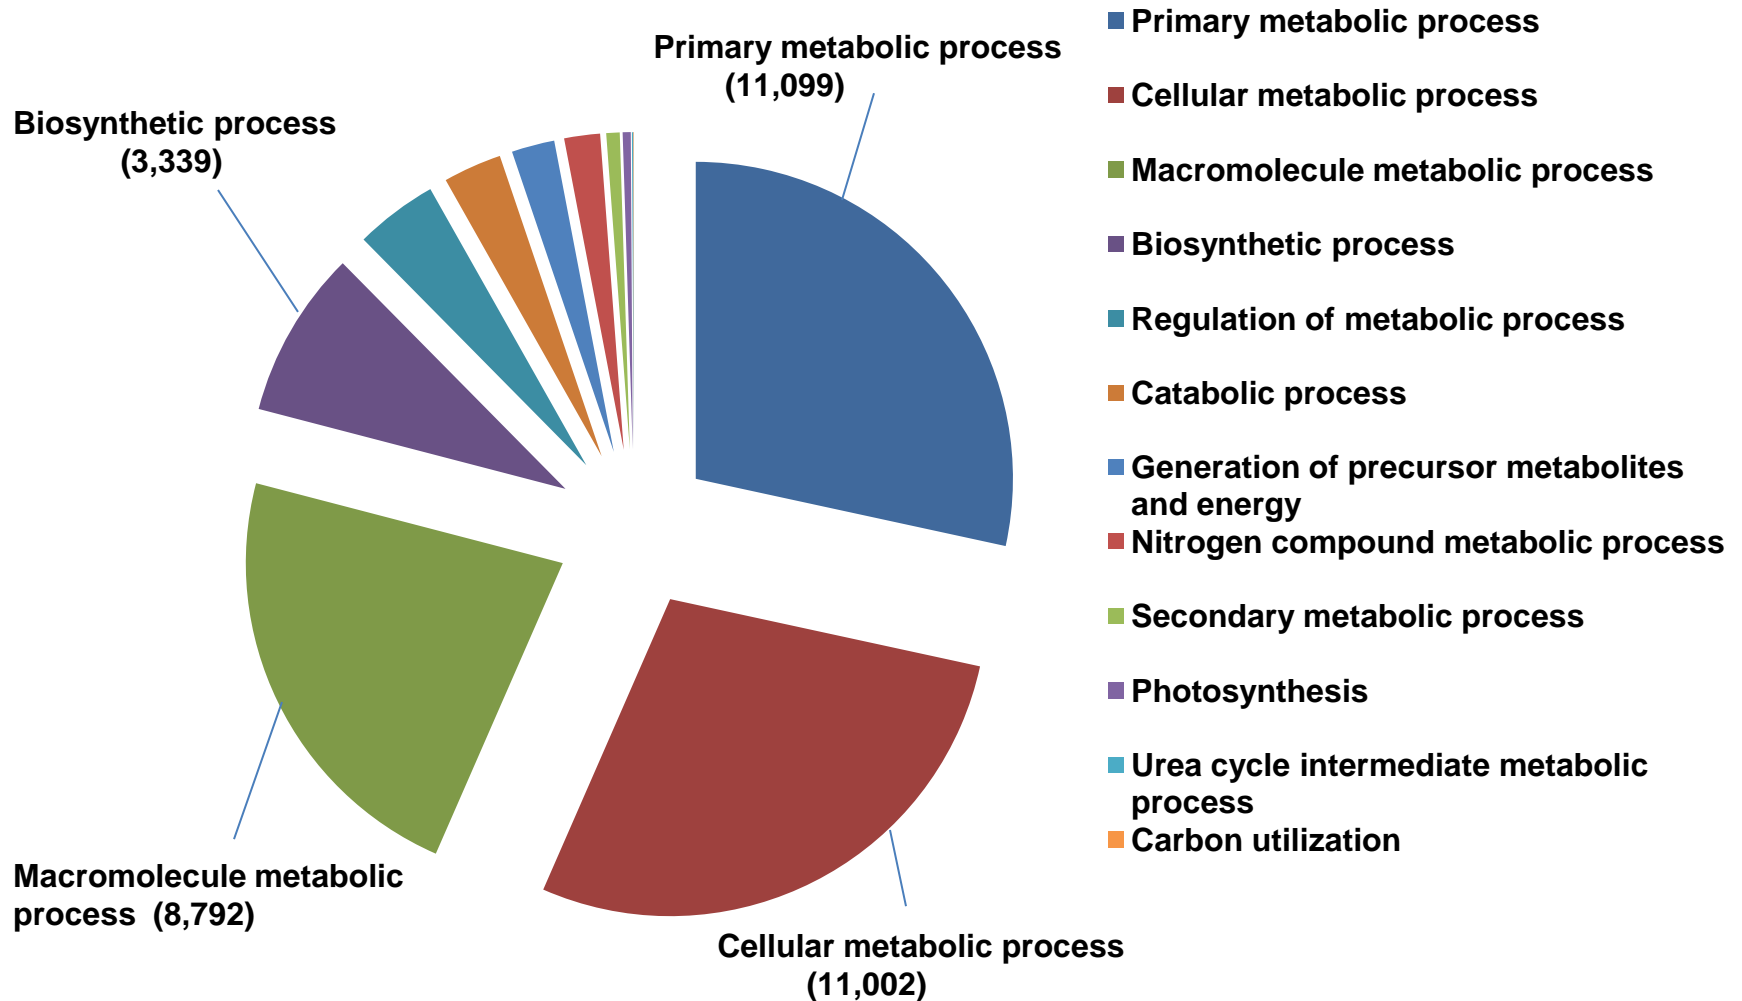

Supplement: S2 (10.1371/journal.pone.0034099.s002) [file journal.pone.0034099.s002]
