# Supplementary material for: Fatty Acid Composition of Developing Sea Buckthorn (Hippophae rhamnoides L.) Berry and the Transcriptome of the Mature Seed
Source: PLoS One. 2012 Apr 27;7(4):e34099. doi: 10.1371/journal.pone.0034099 (PMC3338740; doi:10.1371/journal.pone.0034099)
Supplement: Table S2 — A complete list of contigs and singletons annotated with GO category ‘Fatty acid biosynthetic process’ and ‘Glycerolipid biosynthetic process’. (XLSX) [file pone.0034099.s004.xlsx]

## Sheet: sheet1
FATTY ACID BIOSYNTHETIC PROCESS
Contig/Singleton	Gene ID		Gene Description
CL1557Contig3	AT2G38040.2		CAC3; acetyl-CoA carboxylase
FX9V3UK02IA9PV	AT4G04320.1		malonyl-CoA decarboxylase family protein
FX9V3UK02FE0RW	AT1G77590.1		LACS9 (LONG CHAIN ACYL-COA SYNTHETASE 9); long-chain-fatty-acid-CoA ligase
CL588Contig2	AT1G65290.1		mtACP2 (mitochondrial acyl carrier protein 2); acyl carrier/ metal ion binding
CL19248Contig1	AT3G02630.1		acyl-(acyl-carrier-protein) desaturase, putative / stearoyl-ACP desaturase, putative
FX9V3UK01DNXSO	AT1G65290.1		mtACP2 (mitochondrial acyl carrier protein 2); acyl carrier/ metal ion binding
FX9V3UK02FJQ9C	AT4G23850.1		long-chain-fatty-acid--CoA ligase / long-chain acyl-CoA synthetase
CL5703Contig1	AT5G16390.2		CAC1, CAC1A, BCCP, BCCP1, CAC1-A, BCCP-1 | CAC1 (CHLOROPLASTIC ACETYLCOENZYME A CARBOXYLASE 1); acetyl-CoA carboxylase/ biotin binding
CL579Contig3	AT3G02630.1		acyl-(acyl-carrier-protein) desaturase, putative / stearoyl-ACP desaturase, putative
FX9V3UK02GL5OX	AT1G49430.1		LACS2 (LONG-CHAIN ACYL-COA SYNTHETASE 2); long-chain-fatty-acid-CoA ligase
FX9V3UK01CVLC2	AT1G79750.1		ATNADP-ME4 (NADP-malic enzyme 4); malate dehydrogenase (oxaloacetate-decarboxylating) (NADP+)/ malic enzyme/ oxidoreductase, acting on NADH or NADPH, NAD or NADP as acceptor
CL5Contig41	AT1G79750.1		ATNADP-ME4 (NADP-malic enzyme 4); malate dehydrogenase (oxaloacetate-decarboxylating) (NADP+)/ malic enzyme/ oxidoreductase, acting on NADH or NADPH, NAD or NADP as acceptor
FX9V3UK02JBXHP	AT1G77590.1		LACS9 (LONG CHAIN ACYL-COA SYNTHETASE 9); long-chain-fatty-acid-CoA ligase
CL2870Contig1	AT1G77590.1		LACS9 (LONG CHAIN ACYL-COA SYNTHETASE 9); long-chain-fatty-acid-CoA ligase
CL5158Contig3	AT5G35360.1		CAC2; acetyl-CoA carboxylase/ biotin carboxylase
FX9V3UK02G90D2	AT1G65290.1		mtACP2 (mitochondrial acyl carrier protein 2); acyl carrier/ metal ion binding
CL4458Contig2	AT1G08510.1		FATB (fatty acyl-ACP thioesterases B); acyl carrier/ acyl-[acyl-carrier-protein] hydrolase
FX9V3UK02JCCTL	AT1G79750.1		ATNADP-ME4 (NADP-malic enzyme 4); malate dehydrogenase (oxaloacetate-decarboxylating) (NADP+)/ malic enzyme/ oxidoreductase, acting on NADH or NADPH, NAD or NADP as acceptor
CL3236Contig1	AT4G23850.1		long-chain-fatty-acid--CoA ligase / long-chain acyl-CoA synthetase
FX9V3UK01CVX7W	AT1G79750.1		ATNADP-ME4 (NADP-malic enzyme 4); malate dehydrogenase (oxaloacetate-decarboxylating) (NADP+)/ malic enzyme/ oxidoreductase, acting on NADH or NADPH, NAD or NADP as acceptor
FX9V3UK01CQ5HN	AT1G49430.1		LACS2 (LONG-CHAIN ACYL-COA SYNTHETASE 2); long-chain-fatty-acid-CoA ligase
CL74Contig3	AT2G04350.2		long-chain-fatty-acid--CoA ligase family protein / long-chain acyl-CoA synthetase family protein (LACS8)
CL74Contig1 v.L	AT2G04350.2		long-chain-fatty-acid--CoA ligase family protein / long-chain acyl-CoA synthetase family protein (LACS8)
CL7573Contig1	AT3G12120.2		FAD2 (FATTY ACID DESATURASE 2); delta12-fatty acid dehydrogenase/ omega-6 fatty acid desaturase
CL5Contig16	AT1G79750.1		ATNADP-ME4 (NADP-malic enzyme 4); malate dehydrogenase (oxaloacetate-decarboxylating) (NADP+)/ malic enzyme/ oxidoreductase, acting on NADH or NADPH, NAD or NADP as acceptor
CL1Contig4260	ATCG00500.1		ACCD; Encodes the carboxytransferase beta subunit of the Acetyl-CoA carboxylase (ACCase) complex in plastids. This complex catalyzes the carboxylation of acetyl-CoA to produce malonyl-CoA, the first committed step in fatty acid synthesis.
FX9V3UK02IIX4A	AT4G23850.1		long-chain-fatty-acid--CoA ligase / long-chain acyl-CoA synthetase
FX9V3UK02HGZIO	AT2G46210.1		delta-8 sphingolipid desaturase, putative
CL3484Contig1	AT1G10670.2		ACLA-1; ATP citrate synthase
FX9V3UK02FXRJS	AT1G65290.1		mtACP2 (mitochondrial acyl carrier protein 2); acyl carrier/ metal ion binding
FX9V3UK01AXZHM	AT5G16390.1		CAC1, CAC1A, BCCP, BCCP1 | CAC1 (CHLOROPLASTIC ACETYLCOENZYME A CARBOXYLASE 1); acetyl-CoA carboxylase/ biotin binding
FX9V3UK01EEH46	AT1G79750.1		ATNADP-ME4 | ATNADP-ME4 (NADP-malic enzyme 4); malate dehydrogenase (oxaloacetate-decarboxylating) (NADP+)/ malic enzyme/ oxidoreductase, acting on NADH or NADPH, NAD or NADP as acceptor
FX9V3UK02FINZY	AT1G08510.1		FATB (fatty acyl-ACP thioesterases B); acyl carrier/ acyl-[acyl-carrier-protein] hydrolase
CL18253Contig1	AT5G16390.2		CAC1, CAC1A, BCCP, BCCP1, CAC1-A, BCCP-1 | CAC1 (CHLOROPLASTIC ACETYLCOENZYME A CARBOXYLASE 1); acetyl-CoA carboxylase/ biotin binding
CL5158Contig1	AT5G35360.1		CAC2; acetyl-CoA carboxylase/ biotin carboxylase
CL828Contig6	AT1G76690.1		ATOPR2
CL588Contig1	AT1G65290.1		mtACP2 (mitochondrial acyl carrier protein 2); acyl carrier/ metal ion binding
CL5330Contig2	AT4G23850.1		long-chain-fatty-acid--CoA ligase / long-chain acyl-CoA synthetase
CL5158Contig2	AT5G35360.2		CAC2; acetyl-CoA carboxylase/ biotin carboxylase
CL10403Contig1	AT1G62640.2		KAS III (3-KETOACYL-ACYL CARRIER PROTEIN SYNTHASE III); 3-oxoacyl-[acyl-carrier-protein] synthase/ catalytic/ transferase, transferring acyl groups other than amino-acyl groups
CL5Contig24	AT1G79750.1		ATNADP-ME4 | ATNADP-ME4 (NADP-malic enzyme 4); malate dehydrogenase (oxaloacetate-decarboxylating) (NADP+)/ malic enzyme/ oxidoreductase, acting on NADH or NADPH, NAD or NADP as acceptor
CL1557Contig2	AT2G38040.2		CAC3; acetyl-CoA carboxylase
CL1Contig3463	AT5G16240.1		acyl-(acyl-carrier-protein) desaturase, putative / stearoyl-ACP desaturase, putative
CL3236Contig3	AT4G23850.1		long-chain-fatty-acid--CoA ligase / long-chain acyl-CoA synthetase
CL12322Contig1	AT2G38040.2		CAC3; acetyl-CoA carboxylase
FX9V3UK01A7FNT	AT1G62640.2		KAS III (3-KETOACYL-ACYL CARRIER PROTEIN SYNTHASE III); 3-oxoacyl-[acyl-carrier-protein] synthase/ catalytic/ transferase, transferring acyl groups other than amino-acyl groups
FX9V3UK01C2X6F	AT1G62640.2		KAS III (3-KETOACYL-ACYL CARRIER PROTEIN SYNTHASE III); 3-oxoacyl-[acyl-carrier-protein] synthase/ catalytic/ transferase, transferring acyl groups other than amino-acyl groups
CL3236Contig2	AT4G23850.1		long-chain-fatty-acid--CoA ligase / long-chain acyl-CoA synthetase
FX9V3UK01CJJZV	AT1G79750.1		ATNADP-ME4 (NADP-malic enzyme 4); malate dehydrogenase (oxaloacetate-decarboxylating) (NADP+)/ malic enzyme/ oxidoreductase, acting on NADH or NADPH, NAD or NADP as acceptor
CL9844Contig1	AT3G12120.2		FAD2 (FATTY ACID DESATURASE 2); delta12-fatty acid dehydrogenase/ omega-6 fatty acid desaturase
CL579Contig2	AT3G02630.1		acyl-(acyl-carrier-protein) desaturase, putative / stearoyl-ACP desaturase, putative
CL74Contig6	AT2G04350.2		long-chain-fatty-acid--CoA ligase family protein / long-chain acyl-CoA synthetase family protein (LACS8)
FX9V3UK02IWFO8	AT4G23850.1		long-chain-fatty-acid--CoA ligase / long-chain acyl-CoA synthetase
FX9V3UK02FXUN0	AT2G22230.1		beta-hydroxyacyl-ACP dehydratase, putative
CL5330Contig1	AT4G11030.1		long-chain-fatty-acid--CoA ligase, putative / long-chain acyl-CoA synthetase, putative
FX9V3UK02HFI9T	AT1G08510.1		FATB (fatty acyl-ACP thioesterases B); acyl carrier/ acyl-[acyl-carrier-protein] hydrolase
FX9V3UK01DQ1M4	AT1G62640.2		KAS III (3-KETOACYL-ACYL CARRIER PROTEIN SYNTHASE III); 3-oxoacyl-[acyl-carrier-protein] synthase/ catalytic/ transferase, transferring acyl groups other than amino-acyl groups
FX9V3UK01D37GO	AT2G46210.1		delta-8 sphingolipid desaturase, putative
FX9V3UK01EGGO2	AT1G62640.2		KAS III (3-KETOACYL-ACYL CARRIER PROTEIN SYNTHASE III); 3-oxoacyl-[acyl-carrier-protein] synthase/ catalytic/ transferase, transferring acyl groups other than amino-acyl groups
CL5Contig35	AT1G79750.1		ATNADP-ME4 (NADP-malic enzyme 4); malate dehydrogenase (oxaloacetate-decarboxylating) (NADP+)/ malic enzyme/ oxidoreductase, acting on NADH or NADPH, NAD or NADP as acceptor
CL5438Contig2	AT2G47240.2		LACS1; long-chain-fatty-acid--CoA ligase family protein / long-chain acyl-CoA synthetase family protein
CL74Contig7	AT2G04350.2		long-chain-fatty-acid--CoA ligase family protein / long-chain acyl-CoA synthetase family protein (LACS8)
CL10280Contig1	AT3G12120.2		FAD2 (FATTY ACID DESATURASE 2); delta12-fatty acid dehydrogenase/ omega-6 fatty acid desaturase
CL8330Contig1	AT5G15530.1		BCCP2, CAC1-B | BCCP2 (BIOTIN CARBOXYL CARRIER PROTEIN 2); biotin binding
CL18723Contig1	AT3G02630.1		acyl-(acyl-carrier-protein) desaturase, putative / stearoyl-ACP desaturase, putative
FX9V3UK01BJAY1	AT1G65290.1		mtACP2 (mitochondrial acyl carrier protein 2); acyl carrier/ metal ion binding
FX9V3UK01AX4RM	AT4G04320.2		malonyl-CoA decarboxylase family protein
CL4678Contig2	AT1G24360.1		3-oxoacyl-(acyl-carrier protein) reductase, chloroplast / 3-ketoacyl-acyl carrier protein reductase
CL13764Contig1	AT4G23850.1		long-chain-fatty-acid--CoA ligase / long-chain acyl-CoA synthetase
CL15619Contig1	AT2G47240.2		long-chain-fatty-acid--CoA ligase family protein / long-chain acyl-CoA synthetase family protein
CL588Contig3	AT1G65290.1		mtACP2 (mitochondrial acyl carrier protein 2); acyl carrier/ metal ion binding
CL10280Contig2	AT3G12120.2		FAD2 (FATTY ACID DESATURASE 2); delta12-fatty acid dehydrogenase/ omega-6 fatty acid desaturase
CL4678Contig1	AT1G24360.1		3-oxoacyl-(acyl-carrier protein) reductase, chloroplast / 3-ketoacyl-acyl carrier protein reductase
CL5Contig21	AT1G79750.1		ATNADP-ME4 (NADP-malic enzyme 4); malate dehydrogenase (oxaloacetate-decarboxylating) (NADP+)/ malic enzyme/ oxidoreductase, acting on NADH or NADPH, NAD or NADP as acceptor
FX9V3UK02I4P3Z	AT4G04320.2		malonyl-CoA decarboxylase family protein
CL5438Contig1	AT2G47240.2		LACS1, long-chain-fatty-acid--CoA ligase family protein / long-chain acyl-CoA synthetase family protein
FX9V3UK01CCSHR	AT1G79750.1		ATNADP-ME4 (NADP-malic enzyme 4); malate dehydrogenase (oxaloacetate-decarboxylating) (NADP+)/ malic enzyme/ oxidoreductase, acting on NADH or NADPH, NAD or NADP as acceptor
FX9V3UK02G0PGE	AT2G38040.2		CAC3; acetyl-CoA carboxylase
CL8506Contig1	AT3G12120.2		FAD2 (FATTY ACID DESATURASE 2); delta12-fatty acid dehydrogenase/ omega-6 fatty acid desaturase
CL1Contig3241	AT1G24360.1		3-oxoacyl-(acyl-carrier protein) reductase, chloroplast / 3-ketoacyl-acyl carrier protein reductase
FX9V3UK02H6IOW	AT5G15530.1		CAC1, BCCP2 (BIOTIN CARBOXYL CARRIER PROTEIN 2); biotin binding
CL3499Contig1	AT3G25110.1		AtFaTA (Arabidopsis FatA acyl-ACP thioesterase); acyl carrier/ acyl-[acyl-carrier-protein] hydrolase
CL7005Contig1	AT5G15530.1		BCCP2, CAC1-B | BCCP2 (BIOTIN CARBOXYL CARRIER PROTEIN 2); biotin binding
FX9V3UK02HQ3I2	AT1G79750.1		ATNADP-ME4 (NADP-malic enzyme 4); malate dehydrogenase (oxaloacetate-decarboxylating) (NADP+)/ malic enzyme/ oxidoreductase, acting on NADH or NADPH, NAD or NADP as acceptor
FX9V3UK01BSROL	AT1G65290.1		mtACP2 (mitochondrial acyl carrier protein 2); acyl carrier/ metal ion binding
FX9V3UK02HUOG7	AT1G79750.1		ATNADP-ME4 (NADP-malic enzyme 4); malate dehydrogenase (oxaloacetate-decarboxylating) (NADP+)/ malic enzyme/ oxidoreductase, acting on NADH or NADPH, NAD or NADP as acceptor
FX9V3UK01AG0KZ	AT1G77590.1		LACS9 (LONG CHAIN ACYL-COA SYNTHETASE 9); long-chain-fatty-acid-CoA ligase
CL1Contig2000	AT5G16230.1		acyl-(acyl-carrier-protein) desaturase, putative / stearoyl-ACP desaturase, putative
FX9V3UK01ARMKJ	AT1G10670.2		ACLA-1; ATP citrate synthase
CL14081Contig1	AT1G43800.1		acyl-(acyl-carrier-protein) desaturase, putative / stearoyl-ACP desaturase, putative
CL1Contig125	ATCG00500.1		ACCD; Encodes the carboxytransferase beta subunit of the Acetyl-CoA carboxylase (ACCase) complex in plastids. This complex catalyzes the carboxylation of acetyl-CoA to produce malonyl-CoA, the first committed step in fatty acid synthesis.
CL6517Contig1	AT2G47240.2		LACS1; long-chain-fatty-acid--CoA ligase family protein / long-chain acyl-CoA synthetase family protein
CL4458Contig1	AT1G08510.1		FATB (fatty acyl-ACP thioesterases B); acyl carrier/ acyl-[acyl-carrier-protein] hydrolase
OXYLIPIN BIOSYNTHETIC PROCESS
Contig/Singleton	Gene ID		Gene Description
FX9V3UK01AVX0V	AT3G45140.1		ATLOX2, LOX2 (LIPOXYGENASE 2); lipoxygenase
FX9V3UK02J1E0A	AT2G43710.1		FAB2 ; SSI2; acyl-[acyl-carrier-protein] desaturase/ stearoyl-CoA 9-desaturase
FX9V3UK02F8Y3R	AT1G76690.1		OPR2, ATOPR2
FX9V3UK02IZUT6	AT2G43710.1		FAB2; SSI2; acyl-[acyl-carrier-protein] desaturase/ stearoyl-CoA 9-desaturase
CL8716Contig1	AT2G06050.3		OPR3 (OPDA-REDUCTASE 3); 12-oxophytodienoate reductase
CL5132Contig1	AT2G33150.1		PKT3, PED1, KAT2 ; PKT3 (PEROXISOMAL 3-KETOACYL-COA THIOLASE 3); acetyl-CoA C-acyltransferase
CL18730Contig1	AT1G20510.1		OPCL1 (OPC-8:0 COA LIGASE1); 4-coumarate-CoA ligase
FX9V3UK01CZXD9	AT1G18020.1		12-oxophytodienoate reductase, putative
FX9V3UK02H2T3X	AT1G55020.1		LOX1; lipoxygenase
CL353Contig4	AT2G33150.1		PKT3, PED1, KAT2; PKT3 (PEROXISOMAL 3-KETOACYL-COA THIOLASE 3); acetyl-CoA C-acyltransferase
CL1Contig2516	AT2G43710.1		FAB2; SSI2; acyl-[acyl-carrier-protein] desaturase/ stearoyl-CoA 9-desaturase
CL13959Contig1	AT5G63380.1		4-coumarate--CoA ligase family protein / 4-coumaroyl-CoA synthase family protein
FX9V3UK02GU1AZ	AT5G42650.1		AOS, CYP74A, DDE2; AOS (ALLENE OXIDE SYNTHASE); allene oxide synthase/ hydro-lyase/ oxygen binding
FX9V3UK01CR5RL	AT2G06050.3		OPR3 (OPDA-REDUCTASE 3); 12-oxophytodienoate reductase
CL1Contig434	AT2G43710.1		FAB2; SSI2; acyl-[acyl-carrier-protein] desaturase/ stearoyl-CoA 9-desaturase
CL828Contig7	AT1G76680.2		OPR1; 12-oxophytodienoate reductase
FX9V3UK01BGFKG	AT1G17420.1		LOX3; electron carrier/ iron ion binding / lipoxygenase/ metal ion binding / oxidoreductase
CL13427Contig1	AT5G42650.1		AOS, CYP74A, DDE2; AOS (ALLENE OXIDE SYNTHASE); allene oxide synthase/ hydro-lyase/ oxygen binding
CL1Contig5118	AT2G43710.1		FAB2; SSI2; acyl-[acyl-carrier-protein] desaturase/ stearoyl-CoA 9-desaturase
CL828Contig6	AT1G76690.1		OPR2, ATOPR2
FX9V3UK02HC9B6	AT2G43710.1		FAB2; SSI2; acyl-[acyl-carrier-protein] desaturase/ stearoyl-CoA 9-desaturase
CL19857Contig1	AT1G72520.1		lipoxygenase, putative
CL15059Contig1	AT1G13280.1		AOC4 (ALLENE OXIDE CYCLASE 4); allene-oxide cyclase
FX9V3UK01AWTQ6	AT4G05160.1		4-coumarate--CoA ligase, putative / 4-coumaroyl-CoA synthase, putative
FX9V3UK02GB1UN	AT1G76690.1		OPR2, ATOPR2
CL5224Contig1	AT4G05160.1		4-coumarate--CoA ligase, putative / 4-coumaroyl-CoA synthase, putative
CL1Contig4936	AT2G43710.1		FAB2; SSI2; acyl-[acyl-carrier-protein] desaturase/ stearoyl-CoA 9-desaturase
CL828Contig2	AT1G76690.1		OPR2, ATOPR2
FX9V3UK01AM7ER	AT5G42650.1		AOS, CYP74A, DDE2 ; AOS (ALLENE OXIDE SYNTHASE); allene oxide synthase/ hydro-lyase/ oxygen binding
FX9V3UK02GT1KJ	AT3G45140.1		ATLOX2, LOX2 (LIPOXYGENASE 2); lipoxygenase
CL828Contig1	AT1G76690.1		OPR2, ATOPR2
CL1Contig942	AT2G43710.1		FAB2; SSI2; acyl-[acyl-carrier-protein] desaturase/ stearoyl-CoA 9-desaturase
CL1Contig1940	AT2G43710.1		FAB2; SSI2; acyl-[acyl-carrier-protein] desaturase/ stearoyl-CoA 9-desaturase
CL5224Contig3	AT4G05160.1		4-coumarate--CoA ligase, putative / 4-coumaroyl-CoA synthase, putative
FX9V3UK02JIGEG	AT1G76690.1		OPR2, ATOPR2
FX9V3UK02F8AUG	AT5G63380.1		4-coumarate--CoA ligase family protein / 4-coumaroyl-CoA synthase family protein
FX9V3UK01BQYRD	AT2G33150.1		PKT3, PED1, KAT2; PKT3 (PEROXISOMAL 3-KETOACYL-COA THIOLASE 3); acetyl-CoA C-acyltransferase
CL579Contig1	AT2G43710.1		FAB2, SSI2; acyl-[acyl-carrier-protein] desaturase/ stearoyl-CoA 9-desaturase
CL9578Contig1	AT1G72520.1		lipoxygenase, putative
CL1Contig2162	AT2G43710.1		FAB2; SSI2; acyl-[acyl-carrier-protein] desaturase/ stearoyl-CoA 9-desaturase
FX9V3UK01EUGVR	AT2G33150.1		PKT3, PED1, KAT2; PKT3 (PEROXISOMAL 3-KETOACYL-COA THIOLASE 3); acetyl-CoA C-acyltransferase
CL353Contig2	AT2G33150.1		PKT3, PED1, KAT2; PKT3 (PEROXISOMAL 3-KETOACYL-COA THIOLASE 3); acetyl-CoA C-acyltransferase
CL353Contig1	AT2G33150.1		PKT3, PED1, KAT2; PKT3 (PEROXISOMAL 3-KETOACYL-COA THIOLASE 3); acetyl-CoA C-acyltransferase
FX9V3UK02JT7IU	AT3G45140.1		ATLOX2; LOX2 (LIPOXYGENASE 2); lipoxygenase
CL828Contig4	AT1G76690.1		OPR2, ATOPR2
CL15978Contig1	AT3G45140.1		ATLOX2, LOX2 (LIPOXYGENASE 2); lipoxygenase
FX9V3UK02IH4EE	AT2G33150.1		PKT3, PED1, KAT2; PKT3 (PEROXISOMAL 3-KETOACYL-COA THIOLASE 3); acetyl-CoA C-acyltransferase
WAX BIOSYNTHETIC PROCESS
Contig/Singleton	Gene ID		Gene Description
CL9307Contig1	AT3G55360.1		CER10, ECR, ATTSC13, TSC13; CER10; 3-oxo-5-alpha-steroid 4-dehydrogenase/ fatty acid elongase/ trans-2-enoyl-CoA reductase (NADPH)
CL1087Contig8	AT5G57800.1		FLP1, YRE, CER3, WAX2; CER3 (ECERIFERUM 3); binding / catalytic/ iron ion binding / oxidoreductase
CL1087Contig9	AT5G57800.1		FLP1, YRE, CER3, WAX2; CER3 (ECERIFERUM 3); binding / catalytic/ iron ion binding / oxidoreductase
FX9V3UK02GGKLX	AT5G57800.1		FLP1, YRE, CER3, WAX2; CER3 (ECERIFERUM 3); binding / catalytic/ iron ion binding / oxidoreductase
CL3484Contig2	AT1G10670.2		ACLA-1; ACLA-1; ATP citrate synthase
CL1087Contig3	AT5G57800.1		FLP1, YRE, CER3, WAX2; CER3 (ECERIFERUM 3); binding / catalytic/ iron ion binding / oxidoreductase
CL3484Contig1	AT1G10670.2		ACLA-1; ATP citrate synthase
CL1087Contig5	AT5G57800.1		FLP1, YRE, CER3, WAX2; CER3 (ECERIFERUM 3); binding / catalytic/ iron ion binding / oxidoreductase
CL1087Contig6	AT5G57800.1		FLP1, YRE, CER3, WAX2; CER3 (ECERIFERUM 3); binding / catalytic/ iron ion binding / oxidoreductase
CL4442Contig2	AT3G55360.1		CER10, ECR, ATTSC13, TSC13; CER10; 3-oxo-5-alpha-steroid 4-dehydrogenase/ fatty acid elongase/ trans-2-enoyl-CoA reductase (NADPH)
CL1087Contig2	AT5G57800.1		FLP1, YRE, CER3, WAX2; CER3 (ECERIFERUM 3); binding / catalytic/ iron ion binding / oxidoreductase
CL3484Contig4	AT1G10670.2		ACLA-1; ATP citrate synthase
CL4442Contig1	AT3G55360.1		CER10, ECR, ATTSC13, TSC13; CER10; 3-oxo-5-alpha-steroid 4-dehydrogenase/ fatty acid elongase/ trans-2-enoyl-CoA reductase (NADPH)
CL1087Contig7	AT5G57800.1		FLP1, YRE, CER3, WAX2; CER3 (ECERIFERUM 3); binding / catalytic/ iron ion binding / oxidoreductase
FX9V3UK02J1E0A	AT1G10670.2		ACLA-1; ATP citrate synthase
GLYCEROLIPID BIOSYNTHETIC PROCESS
Contig/Singleton	Gene ID		Gene Description
CL2879Contig3	AT5G60620.1		phospholipid/glycerol acyltransferase family protein
CL2879Contig1	AT5G60620.1		phospholipid/glycerol acyltransferase family protein
FX9V3UK02GSRCM	AT5G60620.1		phospholipid/glycerol acyltransferase family protein
CL71Contig22	AT2G19450.1		TAG1, AS11, ABX45, DGAT1, RDS1, ATDGAT; TAG1 (TRIACYLGLYCEROL BIOSYNTHESIS DEFECT 1); diacylglycerol O-acyltransferase
CL71Contig3	AT2G19450.1		TAG1, AS11, ABX45, DGAT1, RDS1, ATDGAT; TAG1 (TRIACYLGLYCEROL BIOSYNTHESIS DEFECT 1); diacylglycerol O-acyltransferase
CL71Contig12	AT2G19450.1		TAG1, AS11, ABX45, DGAT1, RDS1, ATDGAT; TAG1 (TRIACYLGLYCEROL BIOSYNTHESIS DEFECT 1); diacylglycerol O-acyltransferase
CL2879Contig2	AT5G60620.1		phospholipid/glycerol acyltransferase family protein
FX9V3UK02GLKQ4	AT2G19450.1		TAG1, AS11, ABX45, DGAT1, RDS1, ATDGAT; TAG1 (TRIACYLGLYCEROL BIOSYNTHESIS DEFECT 1); diacylglycerol O-acyltransferase
CL71Contig29	AT2G19450.1		TAG1, AS11, ABX45, DGAT1, RDS1, ATDGAT; TAG1 (TRIACYLGLYCEROL BIOSYNTHESIS DEFECT 1); diacylglycerol O-acyltransferase
CL71Contig25	AT2G19450.1		TAG1, AS11, ABX45, DGAT1, RDS1, ATDGAT; TAG1 (TRIACYLGLYCEROL BIOSYNTHESIS DEFECT 1); diacylglycerol O-acyltransferase
CL71Contig26	AT2G19450.1		TAG1, AS11, ABX45, DGAT1, RDS1, ATDGAT; TAG1 (TRIACYLGLYCEROL BIOSYNTHESIS DEFECT 1); diacylglycerol O-acyltransferase
CL71Contig27	AT2G19450.1		TAG1, AS11, ABX45, DGAT1, RDS1, ATDGAT; TAG1 (TRIACYLGLYCEROL BIOSYNTHESIS DEFECT 1); diacylglycerol O-acyltransferase
FX9V3UK02JGQ3K	AT2G19450.1		TAG1, AS11, ABX45, DGAT1, RDS1, ATDGAT; TAG1 (TRIACYLGLYCEROL BIOSYNTHESIS DEFECT 1); diacylglycerol O-acyltransferase
FX9V3UK02GOZ55	AT5G60620.1		phospholipid/glycerol acyltransferase family protein
CL71Contig5	AT2G19450.1		TAG1, AS11, ABX45, DGAT1, RDS1, ATDGAT; TAG1 (TRIACYLGLYCEROL BIOSYNTHESIS DEFECT 1); diacylglycerol O-acyltransferase
CL71Contig24	AT2G19450.1		TAG1, AS11, ABX45, DGAT1, RDS1, ATDGAT; TAG1 (TRIACYLGLYCEROL BIOSYNTHESIS DEFECT 1); diacylglycerol O-acyltransferase
FX9V3UK02GK93S	AT2G19450.1		TAG1, AS11, ABX45, DGAT1, RDS1, ATDGAT; TAG1 (TRIACYLGLYCEROL BIOSYNTHESIS DEFECT 1); diacylglycerol O-acyltransferase
CL71Contig14	AT2G19450.1		TAG1, AS11, ABX45, DGAT1, RDS1, ATDGAT; TAG1 (TRIACYLGLYCEROL BIOSYNTHESIS DEFECT 1); diacylglycerol O-acyltransferase
CL71Contig6	AT2G19450.1		TAG1, AS11, ABX45, DGAT1, RDS1, ATDGAT; TAG1 (TRIACYLGLYCEROL BIOSYNTHESIS DEFECT 1); diacylglycerol O-acyltransferase
CL71Contig19	AT2G19450.1		TAG1, AS11, ABX45, DGAT1, RDS1, ATDGAT; TAG1 (TRIACYLGLYCEROL BIOSYNTHESIS DEFECT 1); diacylglycerol O-acyltransferase
FX9V3UK01CFGSJ	AT2G19450.1		TAG1, AS11, ABX45, DGAT1, RDS1, ATDGAT;TAG1 (TRIACYLGLYCEROL BIOSYNTHESIS DEFECT 1); diacylglycerol O-acyltransferase
