# Supplementary material for: Fatty Acid Composition of Developing Sea Buckthorn (Hippophae rhamnoides L.) Berry and the Transcriptome of the Mature Seed
Source: PLoS One. 2012 Apr 27;7(4):e34099. doi: 10.1371/journal.pone.0034099 (PMC3338740; doi:10.1371/journal.pone.0034099)
Supplement: Table S3 — A detailed version of Table 3 showing all contigs and singletons related to fatty acid biosynthesis genes. (XLSX) [file pone.0034099.s005.xlsx]

## Sheet: table.txt
Gene Symbol	Gene Annotation	Contigs	Singletons	Reads/Gene	Gene Length	Gene ID	Contig Name	Reads/Contig	Contig Length	Global Gene Identity	Local Gene Identity
ACC2	ACC2 (ACETYL-COA CARBOXYLASE 2); acetyl-CoA carboxylase	9	7	66	7071	AT1G36180	CL10473Contig1	4	1170	0.116	0.379
							CL1337Contig1	10	1437	0.137	0.391
							CL1337Contig2	11	874	0.092	0.345
							CL1337Contig3	8	1801	0.185	0.715
							CL1337Contig4	13	1343	0.086	0.681
							CL15520Contig1	2	437	0.041	0.381
							CL5158Contig2	2	555	0.049	0.477
							CL5158Contig3	5	936	0.088	0.41
							CL9445Contig1	4	592	0.053	0.518
							FX9V3UK01BG24H	1	314	0.032	0.616
							FX9V3UK01BT7WG	1	396	0.044	0.789
							FX9V3UK01C8QZ9	1	363	0.038	0.408
							FX9V3UK01CEZ9Z	1	375	0.04	0.415
							FX9V3UK02FQQ2T	1	420	0.047	0.791
							FX9V3UK02I0VVY	1	281	0.028	0.646
							FX9V3UK02JTH2I	1	391	0.041	0.351
KAS I	KAS I (3-KETOACYL-ACYL CARRIER PROTEIN SYNTHASE I); catalytic/ fatty-acid synthase/ transferase, transferring acyl groups other than amino-acyl groups	1	2	4	1422	AT5G46290	CL9108Contig1	2	551	0.24	0.572
							FX9V3UK01ED2XT	1	403	0.198	0.371
							FX9V3UK02GIYNM	1	402	0.186	0.423
KAS II	FAB1 (FATTY ACID BIOSYNTHESIS 1); 3-oxoacyl-[acyl-carrier-protein] synthase/ fatty-acid synthase	1	3	5	1626	AT1G74960	CL9108Contig1	2	551	0.243	0.689
							FX9V3UK01DHJLG	1	363	0.157	0.497
							FX9V3UK01ED2XT	1	403	0.18	0.351
							FX9V3UK02GIYNM	1	402	0.168	0.387
KAS III	KAS III (3-KETOACYL-ACYL CARRIER PROTEIN SYNTHASE III); 3-oxoacyl-[acyl-carrier-protein] synthase/ catalytic/ transferase, transferring acyl groups other than amino-acyl groups	1	4	8	1215	AT1G62640	CL10403Contig1	4	936	0.394	0.729
							FX9V3UK01A7FNT	1	428	0.218	0.362
							FX9V3UK01C2X6F	1	273	0.134	0.492
							FX9V3UK01DQ1M4	1	329	0.213	0.781
							FX9V3UK01EGGO2	1	306	0.186	0.709
KAR	3-oxoacyl-(acyl-carrier protein) reductase, chloroplast / 3-ketoacyl-acyl carrier protein reductase	3	1	22	960	AT1G24360	CL1Contig3241	12	1012	0.413	0.432
							CL4678Contig1	4	326	0.225	0.522
							CL4678Contig2	5	972	0.607	0.681
							FX9V3UK02I9I1N	1	507	0.339	0.399
MOD1, ENR1	MOD1 (MOSAIC DEATH 1); enoyl-[acyl-carrier-protein] reductase (NADH)/ enoyl-[acyl-carrier-protein] reductase/ oxidoreductase	0	2	2	1173	AT2G05990	FX9V3UK01ASL7S	1	351	0.232	0.765
							FX9V3UK02IU9LS	1	430	0.256	0.438
HAD	beta-hydroxyacyl-ACP dehydratase, putative	1	1	3	663	AT2G22230	CL18597Contig1	2	416	0.377	0.399
							FX9V3UK02FXUN0	1	402	0.342	0.421
	Asclepias syriaca acyl-acyl carrier protein desaturase	15	3	364	1158	ASU60277	CL14081Contig1	2	395	0.2	0.451
							CL18723Contig1	2	412	0.266	0.748
							CL19248Contig1	2	588	0.315	0.587
							CL1Contig1940	88	1008	0.334	0.529
							CL1Contig2000	4	484	0.274	0.476
							CL1Contig2162	2	482	0.238	0.356
							CL1Contig2516	3	459	0.258	0.426
							CL1Contig3463	13	775	0.247	0.614
							CL1Contig434	2	360	0.201	0.556
							CL1Contig4936	37	943	0.247	0.596
							CL1Contig5118	113	1768	0.439	0.587
							CL1Contig942	8	545	0.285	0.392
							CL579Contig1	3	462	0.26	0.372
							CL579Contig2	74	1611	0.45	0.565
							CL579Contig3	8	866	0.423	0.501
							FX9V3UK02HC9B6	1	209	0.127	0.502
							FX9V3UK02IZUT6	1	457	0.246	0.41
							FX9V3UK02J1E0A	1	327	0.187	0.64
SAD	acyl-(acyl-carrier-protein) desaturase, putative / stearoyl-ACP desaturase, putative	15	3	364	1176	AT1G43800	CL14081Contig1	2	395	0.186	0.431
							CL18723Contig1	2	412	0.266	0.742
							CL19248Contig1	2	588	0.311	0.578
							CL1Contig1940	88	1008	0.359	0.515
							CL1Contig2000	4	484	0.277	0.492
							CL1Contig2162	2	482	0.234	0.44
							CL1Contig2516	3	459	0.233	0.429
							CL1Contig3463	13	775	0.245	0.612
							CL1Contig434	2	360	0.192	0.498
							CL1Contig4936	37	943	0.25	0.667
							CL1Contig5118	113	1768	0.436	0.62
							CL1Contig942	8	545	0.291	0.349
							CL579Contig1	3	462	0.244	0.384
							CL579Contig2	74	1611	0.482	0.565
							CL579Contig3	8	866	0.44	0.528
							FX9V3UK02HC9B6	1	209	0.123	0.49
							FX9V3UK02IZUT6	1	457	0.25	0.405
							FX9V3UK02J1E0A	1	327	0.184	0.626
FAD2	FAD2 (FATTY ACID DESATURASE 2); delta12-fatty acid dehydrogenase/ omega-6 fatty acid desaturase	8	2	37	1152	AT3G12120	CL10280Contig1	2	501	0.294	0.346
							CL10280Contig2	2	772	0.294	0.391
							CL12952Contig1	3	640	0.319	0.396
							CL5560Contig1	8	1251	0.35	0.402
							CL5598Contig1	7	1203	0.46	0.479
							CL7573Contig1	5	836	0.299	0.668
							CL8506Contig1	5	613	0.274	0.412
							CL9844Contig1	3	731	0.355	0.428
							FX9V3UK02GUC7U	1	497	0.282	0.363
							FX9V3UK02JE28P	1	415	0.239	0.351
FAD3	FAD3 (FATTY ACID DESATURASE 3); omega-3 fatty acid desaturase	9	2	39	1161	AT2G29980	CL10280Contig1	2	501	0.276	0.425
							CL10280Contig2	2	772	0.358	0.381
							CL12952Contig1	3	640	0.338	0.403
							CL19579Contig1	2	417	0.242	0.375
							CL5560Contig1	8	1251	0.43	0.439
							CL5598Contig1	7	1203	0.649	0.682
							CL7573Contig1	5	836	0.395	0.407
							CL8506Contig1	5	613	0.292	0.414
							CL9844Contig1	3	731	0.365	0.401
							FX9V3UK02GUC7U	1	497	0.272	0.646
							FX9V3UK02JE28P	1	415	0.245	0.644
FAD6, FADC, SFD4	FAD6 (FATTY ACID DESATURASE 6); omega-6 fatty acid desaturase	5	2	27	1347	AT4G30950	CL10280Contig2	2	772	0.35	0.417
							CL12952Contig1	3	640	0.353	0.542
							CL5560Contig1	8	1251	0.383	0.415
							CL5598Contig1	7	1203	0.424	0.465
							CL8506Contig1	5	613	0.272	0.419
							FX9V3UK02G9U8O	1	337	0.161	0.385
							FX9V3UK02HV84L	1	411	0.186	0.724
FAD7, FADD	FAD7 (FATTY ACID DESATURASE 7); omega-3 fatty acid desaturase	9	4	41	1341	AT3G11170	CL10280Contig1	2	501	0.268	0.365
							CL10280Contig2	2	772	0.335	0.418
							CL12952Contig1	3	640	0.324	0.383
							CL19579Contig1	2	417	0.236	0.33
							CL5560Contig1	8	1251	0.383	0.434
							CL5598Contig1	7	1203	0.613	0.669
							CL7573Contig1	5	836	0.277	0.413
							CL8506Contig1	5	613	0.257	0.411
							CL9844Contig1	3	731	0.35	0.383
							FX9V3UK01D8CI2	1	504	0.164	0.559
							FX9V3UK01EOA7U	1	114	0.068	0.8
							FX9V3UK02GUC7U	1	497	0.27	0.663
							FX9V3UK02JE28P	1	415	0.23	0.683
FAD8	FAD8 (FATTY ACID DESATURASE 8); omega-3 fatty acid desaturase	9	4	41	1308	AT5G05580	CL10280Contig1	2	501	0.248	0.41
							CL10280Contig2	2	772	0.337	0.418
							CL12952Contig1	3	640	0.296	0.447
							CL19579Contig1	2	417	0.199	0.387
							CL5560Contig1	8	1251	0.369	0.415
							CL5598Contig1	7	1203	0.601	0.706
							CL7573Contig1	5	836	0.266	0.436
							CL8506Contig1	5	613	0.303	0.387
							CL9844Contig1	3	731	0.332	0.368
							FX9V3UK01D8CI2	1	504	0.16	0.546
							FX9V3UK01EOA7U	1	114	0.072	0.822
							FX9V3UK02GUC7U	1	497	0.273	0.63
							FX9V3UK02JE28P	1	415	0.247	0.768
FATA	AtFaTA (Arabidopsis FatA acyl-ACP thioesterase); acyl carrier/ acyl-[acyl-carrier-protein] hydrolase	2	1	17	1089	AT3G25110	CL3499Contig1	14	1293	0.529	0.683
							CL4458Contig1	2	483	0.27	0.427
							FX9V3UK02FINZY	1	149	0.094	0.592
FATB	FATB (fatty acyl-ACP thioesterases B); acyl carrier/ acyl-[acyl-carrier-protein] hydrolase	4	3	43	1239	AT1G08510	CL3487Contig1	15	776	0.377	0.401
							CL3499Contig1	14	1293	0.396	0.513
							CL4458Contig1	2	483	0.267	0.372
							CL4458Contig2	9	879	0.261	0.708
							FX9V3UK01AKTBB	1	335	0.216	0.35
							FX9V3UK02FINZY	1	149	0.093	0.788
							FX9V3UK02HFI9T	1	205	0.126	0.765
ATGPAT1, GPAT1	GPAT1 (GLYCEROL-3-PHOSPHATE ACYLTRANSFERASE 1); 1-acylglycerol-3-phosphate O-acyltransferase/ acyltransferase	0	2	2	1758	AT1G06520	FX9V3UK02IPU6M	1	349	0.134	0.387
							FX9V3UK02JX8KP	1	423	0.151	0.438
LPAT4	LPAT4 (LYSOPHOSPHATIDYL ACYLTRANSFERASE 4); acyltransferase	1	0	4	1137	AT1G75020	CL9684Contig1	4	536	0.311	0.402
ATPAP1, PAP1, LPP1, ATLPP1	ATPAP1 (PHOSPHATIDIC ACID PHOSPHATASE 1); phosphatidate phosphatase	2	1	27	984	AT2G01180	CL2162Contig1	24	1341	0.476	0.579
							CL2162Contig2	2	500	0.321	0.484
							FX9V3UK02H49WV	1	412	0.302	0.335
PAP2, ATLPP2, LPP2	LPP2 (LIPID PHOSPHATE PHOSPHATASE 2); acid phosphatase/ phosphatidate phosphatase	2	1	27	873	AT1G15080	CL2162Contig1	24	1341	0.466	0.671
							CL2162Contig2	2	500	0.389	0.539
							FX9V3UK02H49WV	1	412	0.268	0.389
TAG1, AS11, ABX45, DGAT1, RDS1, ATDGAT	TAG1 (TRIACYLGLYCEROL BIOSYNTHESIS DEFECT 1); diacylglycerol O-acyltransferase	16	4	142	1563	AT2G19450	CL71Contig12	21	1065	0.317	0.707
							CL71Contig13	3	461	0.193	0.349
							CL71Contig14	46	2277	0.458	0.606
							CL71Contig15	2	443	0.184	0.494
							CL71Contig18	10	1108	0.376	0.427
							CL71Contig19	2	526	0.193	0.374
							CL71Contig22	2	422	0.192	0.675
							CL71Contig24	10	584	0.223	0.41
							CL71Contig25	7	478	0.149	0.536
							CL71Contig26	7	1142	0.393	0.414
							CL71Contig27	4	739	0.21	0.465
							CL71Contig29	12	999	0.456	0.604
							CL71Contig3	2	365	0.17	0.618
							CL71Contig5	2	273	0.115	0.623
							CL71Contig6	4	492	0.218	0.382
							CL71Contig9	4	714	0.261	0.372
							FX9V3UK01CFGSJ	1	468	0.201	0.399
							FX9V3UK02GK93S	1	392	0.194	0.716
							FX9V3UK02GLKQ4	1	485	0.22	0.347
							FX9V3UK02JGQ3K	1	494	0.222	0.353
DGAT2	DIACYLGLYCEROL ACYTRANSFERASE	4	0	11	945	AT3G51520	CL12762Contig1	3	549	0.24	0.67
							CL15028Contig1	2	323	0.223	0.365
							CL7008Contig1	3	749	0.369	0.38
							CL7008Contig2	3	501	0.328	0.477
LPCAT	LYSOPHOSPHATIDYLCHOLINE ACYTRANSFERASE	3	0	30	1197	AT1G80950	CL1897Contig1	23	1944	0.421	0.671
							CL1897Contig3	4	560	0.287	0.495
							CL1897Contig2	3	485	0.25	0.358
CPT, AAPT1	AMINOALCOHOLPHOSPHOTRANSFERASE 1	3	1	33	1041	AT1G13560	CL1616Contig5	22	1078	0.529	0.733
							CL1616Contig3	5	506	0.211	0.796
							CL1616Contig4	5	478	0.28	0.42
							FX9V3UK02HEHJ0	1	417	0.168	0.772
ATPDAT, PDAT	ATPDAT; phosphatidylcholine-sterol O-acyltransferase	7	2	40	2016	AT5G13640	CL17028Contig1	2	836	0.258	0.391
							CL18346Contig1	2	602	0.198	0.5
							CL2921Contig1	8	741	0.212	0.701
							CL2921Contig2	2	501	0.174	0.367
							CL2921Contig3	9	910	0.291	0.499
							CL4682Contig1	8	1532	0.393	0.431
							CL5268Contig1	7	569	0.122	0.67
							FX9V3UK01EXSLV	1	154	0.059	0.64
							FX9V3UK02IQXS5	1	519	0.179	0.4
