# Supplementary material for: Fatty Acid Composition of Developing Sea Buckthorn (Hippophae rhamnoides L.) Berry and the Transcriptome of the Mature Seed
Source: PLoS One. 2012 Apr 27;7(4):e34099. doi: 10.1371/journal.pone.0034099 (PMC3338740; doi:10.1371/journal.pone.0034099)
Supplement: Table S4 — A complete list of contigs and singletons annotated with GO category ‘Isoprenoid biosynthetic process’. Green colour represents enzymes shown in Figure 8 . (XLSX) [file pone.0034099.s006.xlsx]

## Sheet: Isoprenoid  
ISOPRENOID BIOSYNTHETIC PROCESS - 113 sequences
Terpenoid biosynthetic process - 53 sequences
Contig/Singleton		Gene ID		Symbols & Description
FX9V3UK02G4ION		AT5G11380.1		DXPS3 (1-deoxy-D-xylulose 5-phosphate synthase 3); 1-deoxy-D-xylulose-5-phosphate synthase
CL12172Contig1		AT5G25900.1		GA3, CYP701A3, ATKO1 | GA3 (GA REQUIRING 3); ent-kaurene oxidase/ oxygen binding
CL10268Contig2		AT1G06820.1		CCR2 | CRTISO (CAROTENOID ISOMERASE); carotenoid isomerase
FX9V3UK01ELO8P		AT1G06820.1		CRTISO, CCR2 | CRTISO (CAROTENOID ISOMERASE); carotenoid isomerase
CL3484Contig2		AT1G10670.2		ACLA-1 | ACLA-1; ATP citrate synthase
CL18499Contig1		AT1G31800.1		CYP97A3, LUT5 | CYP97A3 (CYTOCHROME P450-TYPE MONOOXYGENASE 97A3); carotene beta-ring hydroxylase/ oxygen binding
CL12352Contig1		AT5G57030.1		LUT2 (LUTEIN DEFICIENT 2); lycopene epsilon cyclase
FX9V3UK02JQ8S8		AT1G31800.1		LUT5 | CYP97A3 (CYTOCHROME P450-TYPE MONOOXYGENASE 97A3); carotene beta-ring hydroxylase/ oxygen binding
FX9V3UK02F5E7D		AT3G45130.1		LAS1 | LAS1; lanosterol synthase
CL8187Contig1		AT1G06820.1		CRTISO, CCR2 | CRTISO (CAROTENOID ISOMERASE); carotenoid isomerase
CL3484Contig1		AT1G10670.2		ACLA-1; ATP citrate synthase
CL8329Contig1		AT5G17230.3		phytoene synthase (PSY) / geranylgeranyl-diphosphate geranylgeranyl transferase
FX9V3UK02G98TC		AT1G31800.1		CYP97A3, LUT5 | CYP97A3 (CYTOCHROME P450-TYPE MONOOXYGENASE 97A3); carotene beta-ring hydroxylase/ oxygen binding
CL5100Contig1		AT3G04870.2		ZDS, PDE181 | ZDS (ZETA-CAROTENE DESATURASE); carotene 7,8-desaturase
CL3950Contig2		AT3G03710.1		RIF10 | RIF10 (resistant to inhibition with FSM 10); 3'-5'-exoribonuclease/ RNA binding / nucleic acid binding / polyribonucleotide nucleotidyltransferase
CL14116Contig1		AT1G78960.1		ATLUP2; beta-amyrin synthase/ lupeol synthase
FX9V3UK02GKTP9		AT1G06820.1		CRTISO, CCR2 | CRTISO (CAROTENOID ISOMERASE); carotenoid isomerase
FX9V3UK01ANZSJ		AT5G17230.3		phytoene synthase (PSY) / geranylgeranyl-diphosphate geranylgeranyl transferase
FX9V3UK01DQLMR		AT4G14210.2		PDS3, PDS, PDE226 | PDS3 (PHYTOENE DESATURASE 3); phytoene dehydrogenase
FX9V3UK02G07AA		AT3G03710.1		RIF10 | RIF10 (resistant to inhibition with FSM 10); 3'-5'-exoribonuclease/ RNA binding / nucleic acid binding / polyribonucleotide nucleotidyltransferase
FX9V3UK01AK03X		AT4G25700.1		BETA-OHASE 1, B1, chy1 | BETA-OHASE 1 (BETA-HYDROXYLASE 1); carotene beta-ring hydroxylase
CL16533Contig1		AT1G79460.1		GA2, KS, ATKS | GA2 (GA REQUIRING 2); ent-kaurene synthase
CL358Contig6		AT4G25700.1		BETA-OHASE 1, B1, chy1 | BETA-OHASE 1 (BETA-HYDROXYLASE 1); carotene beta-ring hydroxylase
CL11608Contig1		AT2G07050.1		CAS1 | CAS1 (cycloartenol synthase 1); cycloartenol synthase
CL358Contig1		AT4G25700.1		BETA-OHASE 1, B1, chy1 | BETA-OHASE 1 (BETA-HYDROXYLASE 1); carotene beta-ring hydroxylase
FX9V3UK02I62ZZ		AT3G04870.2		ZDS, PDE181 | ZDS (ZETA-CAROTENE DESATURASE); carotene 7,8-desaturase
CL14804Contig1		AT1G31800.1		LUT5 | CYP97A3 (CYTOCHROME P450-TYPE MONOOXYGENASE 97A3); carotene beta-ring hydroxylase/ oxygen binding
CL6121Contig1		AT1G31800.1		CYP97A3, LUT5 | CYP97A3 (CYTOCHROME P450-TYPE MONOOXYGENASE 97A3); carotene beta-ring hydroxylase/ oxygen binding
FX9V3UK02JK8TL		AT1G06820.1		CRTISO, CCR2 | CRTISO (CAROTENOID ISOMERASE); carotenoid isomerase
FX9V3UK01EJ7FZ		AT4G14210.2		PDS3, PDS, PDE226 | PDS3 (PHYTOENE DESATURASE 3); phytoene dehydrogenase
CL15402Contig1		AT3G03710.1		RIF10 | RIF10 (resistant to inhibition with FSM 10); 3'-5'-exoribonuclease/ RNA binding / nucleic acid binding / polyribonucleotide nucleotidyltransferase
CL16372Contig1		AT2G07050.1		CAS1 (cycloartenol synthase 1); cycloartenol synthase
CL358Contig16		AT4G25700.1		BETA-OHASE 1, B1, chy1 | BETA-OHASE 1 (BETA-HYDROXYLASE 1); carotene beta-ring hydroxylase
CL3950Contig1		AT3G03710.1		RIF10 | RIF10 (resistant to inhibition with FSM 10); 3'-5'-exoribonuclease/ RNA binding / nucleic acid binding / polyribonucleotide nucleotidyltransferase
CL8979Contig1		AT1G57770.1		amine oxidase family
CL358Contig2		AT4G25700.1		BETA-OHASE 1, B1, chy1 | BETA-OHASE 1 (BETA-HYDROXYLASE 1); carotene beta-ring hydroxylase
CL3484Contig4		AT1G10670.2		ACLA-1 | ACLA-1; ATP citrate synthase
CL358Contig9		AT5G52570.2		BETA-OHASE 2, B2, CHY2 | BETA-OHASE 2 (BETA-CAROTENE HYDROXYLASE 2); carotene beta-ring hydroxylase
CL5100Contig2		AT3G04870.2		ZDS, PDE181 | ZDS (ZETA-CAROTENE DESATURASE); carotene 7,8-desaturase
CL6019Contig1		AT5G49555.1		amine oxidase-related
CL6019Contig2		AT5G49555.1		amine oxidase-related
CL358Contig8		AT4G25700.1		BETA-OHASE 1, B1, chy1 | BETA-OHASE 1 (BETA-HYDROXYLASE 1); carotene beta-ring hydroxylase
CL18412Contig1		AT2G32440.1		KAO2, CYP88A4 | KAO2 (ENT-KAURENOIC ACID HYDROXYLASE 2); ent-kaurenoate oxidase/ oxygen binding
FX9V3UK01DHWR2		AT1G57770.1		amine oxidase family
FX9V3UK02GKYTE		AT1G57770.1		amine oxidase family
CL6019Contig3		AT5G49555.1		amine oxidase-related
CL3409Contig1		AT2G48120.2		PAC | PAC (PALE CRESS)
FX9V3UK01CDIJK		AT1G31800.1		CYP97A3, LUT5 | CYP97A3 (CYTOCHROME P450-TYPE MONOOXYGENASE 97A3); carotene beta-ring hydroxylase/ oxygen binding
CL358Contig11		AT5G52570.2		BETA-OHASE 2, B2, CHY2 | BETA-OHASE 2 (BETA-CAROTENE HYDROXYLASE 2); carotene beta-ring hydroxylase
FX9V3UK01ARMKJ		AT1G10670.2		ACLA-1 | ACLA-1; ATP citrate synthase
CL358Contig7		AT4G25700.1		BETA-OHASE 1, B1, chy1 | BETA-OHASE 1 (BETA-HYDROXYLASE 1); carotene beta-ring hydroxylase
FX9V3UK01D21T5		AT1G60980.1		ATGA20OX4 | ATGA20OX4 (ARABIDOPSIS THALIANA GIBBERELLIN 20-OXIDASE 4); gibberellin 20-oxidase
CL358Contig12		AT4G25700.1		BETA-OHASE 1, B1, chy1 | BETA-OHASE 1 (BETA-HYDROXYLASE 1); carotene beta-ring hydroxylase
Isopentenyl diphosphate biosynthetic process, mevalonate-independent pathway - 12 sequences
CL3043Contig1		AT5G62790.1		DXR, PDE129 | DXR (1-DEOXY-D-XYLULOSE 5-PHOSPHATE REDUCTOISOMERASE); 1-deoxy-D-xylulose-5-phosphate reductoisomerase
FX9V3UK01BRTOS		AT4G34350.1		CLB6, ISPH, HDR | HDR (4-HYDROXY-3-METHYLBUT-2-ENYL DIPHOSPHATE REDUCTASE); 4-hydroxy-3-methylbut-2-en-1-yl diphosphate reductase/ 4-hydroxy-3-methylbut-2-en-1-yl diphosphate synthase
FX9V3UK01C8GAU		AT4G34350.1		CLB6, ISPH, HDR | HDR (4-HYDROXY-3-METHYLBUT-2-ENYL DIPHOSPHATE REDUCTASE); 4-hydroxy-3-methylbut-2-en-1-yl diphosphate reductase/ 4-hydroxy-3-methylbut-2-en-1-yl diphosphate synthase
FX9V3UK02GZWLW		AT5G60600.3		GCPE, ISPG, CSB3, CLB4, HDS | HDS (4-HYDROXY-3-METHYLBUT-2-ENYL DIPHOSPHATE SYNTHASE); 4 iron, 4 sulfur cluster binding / 4-hydroxy-3-methylbut-2-en-1-yl diphosphate synthase
CL6241Contig1		AT1G63970.1		ISPF, MECPS | ISPF; 2-C-methyl-D-erythritol 2,4-cyclodiphosphate synthase
CL6795Contig1		AT5G60600.3		GCPE, ISPG, CSB3, CLB4, HDS | HDS (4-HYDROXY-3-METHYLBUT-2-ENYL DIPHOSPHATE SYNTHASE); 4 iron, 4 sulfur cluster binding / 4-hydroxy-3-methylbut-2-en-1-yl diphosphate synthase
CL1Contig3958		AT5G60600.3		GCPE, ISPG, CSB3, CLB4, HDS | HDS (4-HYDROXY-3-METHYLBUT-2-ENYL DIPHOSPHATE SYNTHASE); 4 iron, 4 sulfur cluster binding / 4-hydroxy-3-methylbut-2-en-1-yl diphosphate synthase
CL1Contig2870		AT5G60600.3		GCPE, ISPG, CSB3, CLB4, HDS | HDS (4-HYDROXY-3-METHYLBUT-2-ENYL DIPHOSPHATE SYNTHASE); 4 iron, 4 sulfur cluster binding / 4-hydroxy-3-methylbut-2-en-1-yl diphosphate synthase
CL3058Contig2		AT4G34350.1		CLB6, ISPH, HDR | HDR (4-HYDROXY-3-METHYLBUT-2-ENYL DIPHOSPHATE REDUCTASE); 4-hydroxy-3-methylbut-2-en-1-yl diphosphate reductase/ 4-hydroxy-3-methylbut-2-en-1-yl diphosphate synthase
CL3058Contig1		AT4G34350.1		CLB6, ISPH, HDR | HDR (4-HYDROXY-3-METHYLBUT-2-ENYL DIPHOSPHATE REDUCTASE); 4-hydroxy-3-methylbut-2-en-1-yl diphosphate reductase/ 4-hydroxy-3-methylbut-2-en-1-yl diphosphate synthase
FX9V3UK01CFLF3		AT5G62790.1		PDE129 | DXR (1-DEOXY-D-XYLULOSE 5-PHOSPHATE REDUCTOISOMERASE); 1-deoxy-D-xylulose-5-phosphate reductoisomerase
FX9V3UK02GQ7AK		AT5G60600.3		GCPE, ISPG, CSB3, CLB4, HDS | HDS (4-HYDROXY-3-METHYLBUT-2-ENYL DIPHOSPHATE SYNTHASE); 4 iron, 4 sulfur cluster binding / 4-hydroxy-3-methylbut-2-en-1-yl diphosphate synthase
Isopentenyl diphosphate biosynthetic process, mevalonate pathway - 4 sequences
FX9V3UK02HE0B7		AT4G11820.2		HMGS,MVA1 | MVA1; acetyl-CoA C-acetyltransferase/ hydroxymethylglutaryl-CoA synthase
CL1636Contig1		AT4G11820.2		HMGS,MVA1 | MVA1; acetyl-CoA C-acetyltransferase/ hydroxymethylglutaryl-CoA synthase
CL1636Contig3		AT4G11820.2		HMGS, MVA1 | MVA1; acetyl-CoA C-acetyltransferase/ hydroxymethylglutaryl-CoA synthase
CL1636Contig2		AT4G11820.2		HMGS, MVA1 | MVA1; acetyl-CoA C-acetyltransferase/ hydroxymethylglutaryl-CoA synthase
Polyprenol biosynthetic process - 2 sequences
CL4468Contig1		AT5G47770.1		FPS1 (FARNESYL DIPHOSPHATE SYNTHASE 1); dimethylallyltranstransferase/ geranyltranstransferase
FX9V3UK02HAAJP		AT5G47770.1		FPS1 (FARNESYL DIPHOSPHATE SYNTHASE 1); dimethylallyltranstransferase/ geranyltranstransferase
Others
CL603Contig5		AT1G76490.1		HMG1, HMGR1 | HMG1 (HYDROXY METHYLGLUTARYL COA REDUCTASE 1); hydroxymethylglutaryl-CoA reductase
CL1986Contig1		AT3G02780.1		IPP2, IPIAT1, IDI2 | IPP2 (ISOPENTENYL PYROPHOSPHATE:DIMETHYLALLYL PYROPHOSPHATE ISOMERASE 2); isopentenyl-diphosphate-isomerase
FX9V3UK02IH1AR		AT5G60600.2		ISPG, CSB3, CLB4, HDS | HDS (4-HYDROXY-3-METHYLBUT-2-ENYL DIPHOSPHATE SYNTHASE); 4 iron, 4 sulfur cluster binding / 4-hydroxy-3-methylbut-2-en-1-yl diphosphate synthase
FX9V3UK01CW743		AT1G79690.1		atnudt3 (Arabidopsis thaliana Nudix hydrolase homolog 3); hydrolase
FX9V3UK02GN9KE		AT1G79690.1		atnudt3 (Arabidopsis thaliana Nudix hydrolase homolog 3); hydrolase
CL1986Contig5		AT5G16440.1		IPP1 (ISOPENTENYL DIPHOSPHATE ISOMERASE 1); isopentenyl-diphosphate delta-isomerase
CL685Contig2		AT1G76490.1		HMG1, HMGR1 | HMG1 (HYDROXY METHYLGLUTARYL COA REDUCTASE 1); hydroxymethylglutaryl-CoA reductase
FX9V3UK02HW1PM		AT2G34630.2		GPPS, GPS1 | geranyl diphosphate synthase, putative / GPPS, putative / dimethylallyltransferase, putative / prenyl transferase, putative
CL2949Contig1		AT1G79690.1		atnudt3 (Arabidopsis thaliana Nudix hydrolase homolog 3); hydrolase
CL5648Contig1		AT2G34630.2		GPPS, GPS1 | geranyl diphosphate synthase, putative / GPPS, putative / dimethylallyltransferase, putative / prenyl transferase, putative
CL4819Contig1		AT4G38460.1		GGR | GGR (geranylgeranyl reductase); farnesyltranstransferase
CL603Contig3		AT1G76490.1		HMGR1 | HMG1 (HYDROXY METHYLGLUTARYL COA REDUCTASE 1); hydroxymethylglutaryl-CoA reductase
FX9V3UK01B9YUN		AT1G76490.1		HMG1, HMGR1 | HMG1 (HYDROXY METHYLGLUTARYL COA REDUCTASE 1); hydroxymethylglutaryl-CoA reductase
FX9V3UK01EL7NZ		AT5G16440.1		IPP1 (ISOPENTENYL DIPHOSPHATE ISOMERASE 1); isopentenyl-diphosphate delta-isomerase
CL1986Contig2		AT5G16440.1		IPP1 (ISOPENTENYL DIPHOSPHATE ISOMERASE 1); isopentenyl-diphosphate delta-isomerase
FX9V3UK01BWH49		AT5G16440.1		IPP1 (ISOPENTENYL DIPHOSPHATE ISOMERASE 1); isopentenyl-diphosphate delta-isomerase
FX9V3UK02H06JI		AT5G16440.1		IPP1 (ISOPENTENYL DIPHOSPHATE ISOMERASE 1); isopentenyl-diphosphate delta-isomerase
CL7251Contig1		AT1G79690.1		atnudt3 (Arabidopsis thaliana Nudix hydrolase homolog 3); hydrolase
FX9V3UK02GWYPS		AT1G76490.1		HMGR1 | HMG1 (HYDROXY METHYLGLUTARYL COA REDUCTASE 1); hydroxymethylglutaryl-CoA reductase
FX9V3UK01ETRL2		AT5G27450.2		MVK, MK | MK (MEVALONATE KINASE); mevalonate kinase
CL603Contig1		AT1G76490.1		HMG1, HMGR1 | HMG1 (HYDROXY METHYLGLUTARYL COA REDUCTASE 1); hydroxymethylglutaryl-CoA reductase
CL19073Contig1		AT5G27450.2		MVK, MK | MK (MEVALONATE KINASE); mevalonate kinase
CL685Contig4		AT1G76490.1		HMG1, HMGR1 | HMG1 (HYDROXY METHYLGLUTARYL COA REDUCTASE 1); hydroxymethylglutaryl-CoA reductase
FX9V3UK02FIKF3		AT1G76490.1		HMG1, HMGR1 | HMG1 (HYDROXY METHYLGLUTARYL COA REDUCTASE 1); hydroxymethylglutaryl-CoA reductase
CL603Contig7		AT5G60600.3		ISPG,GCPE, CSB3, CLB4, HDS | HDS (4-HYDROXY-3-METHYLBUT-2-ENYL DIPHOSPHATE SYNTHASE); 4 iron, 4 sulfur cluster binding / 4-hydroxy-3-methylbut-2-en-1-yl diphosphate synthase
CL14390Contig1		AT3G54250.1		PMD;diphosphomevalonate decarboxylase; mevalonate diphosphate decarboxylase, putative
CL4317Contig1		AT3G02780.1		IPP2, IPIAT1, IDI2 | IPP2 (ISOPENTENYL PYROPHOSPHATE:DIMETHYLALLYL PYROPHOSPHATE ISOMERASE 2); isopentenyl-diphosphate delta-isomerase
CL603Contig4		AT1G76490.1		HMG1, HMGR1 | HMG1 (HYDROXY METHYLGLUTARYL COA REDUCTASE 1); hydroxymethylglutaryl-CoA reductase
CL1986Contig4		AT5G16440.1		IPP1 (ISOPENTENYL DIPHOSPHATE ISOMERASE 1); isopentenyl-diphosphate delta-isomerase
CL685Contig5		AT2G17370.1		HMG2, HMGR2 | HMG2 (3-HYDROXY-3-METHYLGLUTARYL-COA REDUCTASE 2); hydroxymethylglutaryl-CoA reductase
CL1Contig1349		AT5G60600.2		GCPE, ISPG, CSB3, CLB4, HDS | HDS (4-HYDROXY-3-METHYLBUT-2-ENYL DIPHOSPHATE SYNTHASE); 4 iron, 4 sulfur cluster binding / 4-hydroxy-3-methylbut-2-en-1-yl diphosphate synthase
CL603Contig2		AT1G76490.1		HMG1, HMGR1 | HMG1 (HYDROXY METHYLGLUTARYL COA REDUCTASE 1); hydroxymethylglutaryl-CoA reductase
CL7270Contig1		AT3G54250.1		PMD; MVD1; mevalonate diphosphate decarboxylase, putative
FX9V3UK01AWYS2		AT1G79690.1		atnudt3 (Arabidopsis thaliana Nudix hydrolase homolog 3); hydrolase
CL685Contig6		AT1G76490.1		HMGR1 | HMG1 (HYDROXY METHYLGLUTARYL COA REDUCTASE 1); hydroxymethylglutaryl-CoA reductase
FX9V3UK01CZUEF		AT2G34630.2		GPPS, GPS1 | geranyl diphosphate synthase, putative / GPPS, putative / dimethylallyltransferase, putative / prenyl transferase, putative
CL603Contig6		AT1G76490.1		HMGR1 | HMG1 (HYDROXY METHYLGLUTARYL COA REDUCTASE 1); hydroxymethylglutaryl-CoA reductase
FX9V3UK02JA7IT		AT1G76490.1		HMGR1 | HMG1 (HYDROXY METHYLGLUTARYL COA REDUCTASE 1); hydroxymethylglutaryl-CoA reductase
FX9V3UK02GSKU8		AT1G76490.1		HMGR1 | HMG1 (HYDROXY METHYLGLUTARYL COA REDUCTASE 1); hydroxymethylglutaryl-CoA reductase
CL4317Contig2		AT5G16440.1		IPP1 (ISOPENTENYL DIPHOSPHATE ISOMERASE 1); isopentenyl-diphosphate delta-isomerase
FX9V3UK01EIW87		AT5G60600.1		ISPG,GCPE, CSB3, CLB4, HDS | HDS (4-HYDROXY-3-METHYLBUT-2-ENYL DIPHOSPHATE SYNTHASE); 4 iron, 4 sulfur cluster binding / 4-hydroxy-3-methylbut-2-enyl diphosphate synthase
CL685Contig7		AT1G76490.1		HMG1, HMGR1 | HMG1 (HYDROXY METHYLGLUTARYL COA REDUCTASE 1); hydroxymethylglutaryl-CoA reductase
BLAST
CL12535Contig1 177 2e-44		AT2G26930.1		CMK, ISPE, 4-(CYTIDINE 5′-DIPHOSPHO)-2-C-METHYL-D-ERYTHRITOL KINASE, 4-(CYTIDINE 5'-PHOSPHO)-2-C-METHYL-D-ERITHRITOL KINASE, PDE277
FX9V3UK01EE2RC 57 7e-18		AT2G26930.1		CMK, ISPE, 4-(CYTIDINE 5′-DIPHOSPHO)-2-C-METHYL-D-ERYTHRITOL KINASE, 4-(CYTIDINE 5'-PHOSPHO)-2-C-METHYL-D-ERITHRITOL KINASE, PDE277
FX9V3UK02J1QCA 70 7e-12		AT2G26930.1		CMK, ISPE, 4-(CYTIDINE 5′-DIPHOSPHO)-2-C-METHYL-D-ERYTHRITOL KINASE, 4-(CYTIDINE 5'-PHOSPHO)-2-C-METHYL-D-ERITHRITOL KINASE, PDE277
CLiContig3861		AT5G47720.1		AACT, acetyle-CoA C-acyltransferase, putative/ 3-Ketoacyl-CoA thiolase, putative
CL2651Contig1		AT5G47720.1		AACT, acetyle-CoA C-acyltransferase, putative/ 3-Ketoacyl-CoA thiolase, putative
CL1Contig1959 346 e-118		AT5G47720.1		AACT, acetyle-CoA C-acyltransferase, putative/ 3-Ketoacyl-CoA thiolase, putative
FX9V3UK02J4QGB		AT1G31910.1		PMK, GHMP, Phosphomevalonate kinase GHMP kinase family protein,
FX9V3UK01EIQU0		AT1G31910.1		PMK, GHMP, Phosphomevalonate kinase GHMP kinase family protein,
CL13590Contig1 182 1e-56		AT1G31910.1		PMK, GHMP, Phosphomevalonate kinase GHMP kinase family protein,
