# Supplementary material for: Fatty Acid Composition of Developing Sea Buckthorn (Hippophae rhamnoides L.) Berry and the Transcriptome of the Mature Seed
Source: PLoS One. 2012 Apr 27;7(4):e34099. doi: 10.1371/journal.pone.0034099 (PMC3338740; doi:10.1371/journal.pone.0034099)
Supplement: Table S5 — List of genes annotated with GO category ‘Abiotic stress’, the most closely related sea buckthorn contig, and the total number of unigenes related to a stress gene. (XLSX) [file pone.0034099.s007.xlsx]

## Sheet: Abiotic Stress
ABIOTIC STRESS
HEAT STRESS
Gene Symbol	Arabidopsis gene ID	Contig Name	Contigs+Singletons
HSP81-1	AT5G52640	CL1Contig4975	55
HSP81-2	AT5G56030	CL1Contig3994	55
HSP90.5	AT2G04030	CL163Contig10	51
HSP81-3	AT5G56010	CL1Contig3994	55
HSP18.2	AT5G59720	CL1Contig3354	155
HSP17.6	AT2G29500	CL1Contig5501	152
HSP17.4	AT1G54050	CL1Contig4461	32
HSP21	AT4G27670	CL630Contig1	40
HSP17.8	AT1G07400	CL1Contig111	146
HSP23.5	AT5G51440	CL741Contig2	16
HSP23.6	AT4G25200	CL741Contig1	16
HSP26.5	AT1G52560	CL2Contig43	59
COLD STRESS
ATMKK2	AT4G29810	CL2488Contig1	112
ATRZ-1A	AT3G26420	CL1Contig2740	128
TFL2	AT5G17690	CL1235Contig2	4
VIP4	AT5G61150	CL1501Contig4	3
VRN1	AT3G18990	CL7720Contig1	4
CBF	AT4G25480	CL10920Contig1	68
ESKIMO1	AT3G55990	CL5250Contig1	18
ICE1	AT3G26744	CL1Contig2367	17
ICE2	AT1G12860	CL1Contig5243	14
OSMOTIC STRESS
ATHAL3A	AT3G18030	CL16988Contig1	1
Hydrophobic protein	AT2G38905	CL5241Contig1	17
P5CS2	AT3G55610	CL8859Contig1	6
PDX1	AT5G01410	CL302Contig3	11
RCI2A	AT3G05880	CL3Contig12	17
SLT1	AT2G37570	CL3509Contig2	9
SOS3	AT5G24270	CL3007Contig2	19
AZF2	AT3G19580	CL830Contig4	8
WATER DEPRIVIATION
LEA14	AT1G01470	CL4933Contig1	9
PIP1C	AT1G01620	CL11656Contig1	40
CRY2	AT1G04400	CL10010Contig1	6
AVP1	AT1G15690	CL1Contig1337	28
ALDH3H1	AT1G44170	CL10144Contig1	15
ABF2	AT1G45249	CL12237Contig1	17
RD21	AT1G47128	CL11899Contig1	31
RD20	AT2G33380	CL100Contig10	15
PGGT-I	AT2G39550	CL1809Contig1	6
ERD15	AT2G41430	CL1835Contig1	4
PIP1B	AT2G45960	CL11656Contig1	35
LEA putative	AT2G46140	CL4933Contig1	9
DREB2B	AT3G11020	CL10104Contig1	62
PP2CA	AT3G11410	CL1043Contig1	79
ANAC055	AT3G15500	CL11675Contig1	66
AZF2	AT3G19580	CL12614Contig1	8
ERF7	AT3G20310	CL10104Contig1	76
MBF1C	AT3G24500	CL1Contig401	14
LOX2	AT3G45140	CL15978Contig1	10
FTA	AT3G59380	CL10997Contig1	1
CCD1	AT3G63520	CL633Contig1	7
PIP1;4	AT4G00430	CL11656Contig1	41
SAG21	AT4G02380	CL1Contig1230	5
RD26	AT4G27410	CL11675Contig1	65
OST1	AT4G33950	CL1002Contig4	122
RD19	AT4G39090	CL17654Contig1	30
HD2C	AT5G03740	CL127Contig1	4
DREB2A	AT5G05410	CL10104Contig1	72
LTI65	AT5G52300	CL1Contig3207	7
DNA REPAIR
ATGTF2H2	At1g05055	CL4588Contig2	2
ATM	At3g48190	CL17556Contig1	12
ATP binding	At2g01440	CL13251Contig1	4
ATP binding	At5g50340	CL12181Contig1	2
ATRAD4	At5g16630	CL8684Contig1	4
btfc	At1g18340	CL4223Contig2	2
CHR8	At2g18760	CL10881Contig1	41
CID7	At2g26280	CL250Contig5(FL)	15
DML1	At2g36490	CL466Contig7	16
DML2	At3g10010	CL466Contig1	16
DNA binding	At3g09250	CL5564Contig1(FL)	3
DNA ligase	At1g66730	CL5278Contig1	5
DNA photolyase	At4g25290	CL9205Contig1	2
DNAbind	At3g52905	CL2978Contig1(FL)	3
DNArp	At1g01880	CL12875Contig1	4
Endonuclease	At4g36050	CL10225Contig1	1
Endonuclease	At5g43210	CL9760Contig1	1
Endonuclease	At3g48425	CL3916Contig1	4
Endonuclease-p	At5g26680	CL7225Contig1	4
ERCC1	At3g05210	CL4807Contig1	4
Endo/excinuclease	At2g30350	CL17900Contig1	1
FAS1	At1g65470	CL6609Contig1	7
FPG-1	At1g52500	CL14590Contig1	1
HhH-GPD	At3g07930	CL19066Contig1	0
HhH-GPD	At1g75230	CL1967Contig2	5
HhH-GPD	At1g19480	CL5882Contig2	5
KU70	At1g16970	CL7344Contig2	3
KU80	At1g48050	CL8431Contig1	5
MAG	At3g12040	CL4516Contig1	4
MGfp	At5g57970	CL14323Contig1	3
MLH3	At4g35520	CL12724Contig1	2
MRE11	At5g54260	CL4259Contig2	2
MSH2	At3g18524	CL2248Contig2	8
MSH3	At4g25540	CL17997Contig1	9
MSH7	At3g24495	CL10534Contig1	8
MutS	At5g54090	CL8401Contig1	9
OGG1	At1g21710	CL8824Contig1	3
PARP2	At2g31320	CL4025Contig1	13
PHR2	At2g47590	CL3307Contig1	6
POLL	At1g10520	CL17928Contig1	3
PRLIif	At5g58720	CL2656Contig2	3
RAD23	At1g79650	CL2675Contig1	25
RAD23(putative)	At5g38470	CL113Contig2	26
RAD23	At1g16190	CL2675Contig4	23
RAD50	At2g31970	CL15974Contig1	3
recA	At2g19490	CL16989Contig1	1
recA	At1g79050	CL12835Contig1	3
recombinase	At1g12244	CL5731Contig1	1
RecX	At3g13226	CL15813Contig1	1
RNR2	At3g23580	CL16199Contig1	7
RPA2	At2g24490	CL5263Contig1(FL)	2
t-DNApr	At5g15170	CL4732Contig2	4
tfr	At4g17020	CL7424Contig1	4
TSO2	At3g27060	CL13709Contig1	7
UDNAgfp	At3g18630	CL7126Contig2	4
UVH1	At5g41150	CL17782Contig1	2
UVH3	At3g28030	CL7193Contig1	10
UVRB	At2g03390	CL3946Contig1	2
